# Supplementary material for: Clinical Utility of Body Surface Potential Mapping in CRT Patients
Source: PubMed Central journal article supplement — Arrhythm Electrophysiol Rev. 2021 Jul;10(2):113–9. doi: 10.15420/aer.2021.14 (PMC8335851; doi:10.15420/aer.2021.14), 2021-07
Supplement: aer-10-113-Supp.pdf [file aer-10-113-Supp.pdf]

## Supplementary material: Search strategies

Medline (PubMed) 23.01.2020

(  
    biventricular[tiab] OR  
cardiac resynchronization[tiab] OR  
cardiac resynchronisation[tiab] OR  
resynchronization therapy[tiab] OR  
resynchronisation therapy[tiab] OR  
cardiac resynchronization therapy[mh] OR  
CRT[tiab] OR  
"Cardiac Resynchronization Therapy Devices"[mh]

)  
AND

(  
    body surface potential mapping[tiab] OR  
body surface potential map[tiab] OR  
body surface mapping[tiab] OR  
body surface map[tiab] OR  
BSPM[tiab] OR  
Multi-channel ECG[tiab] OR  
„Body Surface Potential Mapping“[mh] OR  
Cardiac Mapping System[tiab] OR  
ECVUE[tiab] OR  
CardioInsight[tiab] OR  
electrocardiographic imaging [tiab] OR  
ECGi[tiab] OR

ECG belt[tiab]OR

Electrocardiographic mapping[tiab] OR

Electrocardiographic map[tiab] OR

ECM[tiab]

)

Scopus 23.01.2020

TITLE-ABS-KEY(biventricular OR "cardiac resynchroni?ation" OR "resynchroni?ation therapy" OR CRT) AND

TITLE-ABS-KEY("body surface potential map\*" OR "body surface map\*" OR BSPM OR "Multi-channel ECG" OR "Cardiac Mapping System" OR ECVUE OR CardiInsight OR ECGi OR "electrocardiographic imaging" OR "ECG belt" OR "electrocardiographic map\*" OR ECM)

AND ( LIMIT-TO ( DOCTYPE , "ar" ) OR LIMIT-TO ( DOCTYPE , "re" ) )

Web of Science 23.01.2020

(

TS = (biventricular OR "cardiac resynchroni\$ation" OR "resynchroni\$ation therapy" OR CRT)

)

AND

(

TS = ("body surface potential map\*" OR "body surface map\*" OR BSPM OR "Multi-channel ECG" OR "Cardiac Mapping System" OR ECVUE OR CardiInsight OR ECGi OR "electrocardiographic imaging" OR "ECG belt" OR "electrocardiographic map\*" OR ECM)

)

AND DOCUMENT TYPES: (Article OR Review)
